# Supplementary material for: Effects of Sampling Time and Depth on Phytoplankton Metrics in Agricultural Irrigation Ponds
Source: MDPI journal article supplement (doi:10.3390/environments11040074), 2024-04-04
Supplement: s1 [file s1]

## Supplemental Data

Table S1: Descriptive statistics of measured phytoplankton and water quality data at ponds P1 and P2.

| Variable      | Units   | P1       |          |          |          | P2       |          |          |          |
|---------------|---------|----------|----------|----------|----------|----------|----------|----------|----------|
| 2019          |         | Min      | Max      | Mean     | Median   | Min      | Max      | Mean     | Median   |
| Diatoms       | Cells/L | ND*      | 1.85E+06 | 4.48E+05 | 3.59E+05 | ND*      | 5.75E+06 | 1.99E+06 | 1.64E+06 |
| Flagellates   | Cells/L | 3.82E+06 | 6.86E+06 | 4.98E+06 | 4.94E+06 | 5.79E+06 | 4.79E+07 | 1.75E+07 | 9.08E+06 |
| Chlorophytes  | Cells/L | 3.07E+07 | 5.50E+07 | 4.00E+07 | 3.96E+07 | 2.90E+06 | 4.13E+07 | 2.00E+07 | 2.07E+07 |
| Cyanobacteria | Cells/L | ND*      | 3.42E+07 | 6.29E+06 | 1.23E+06 | ND*      | 3.70E+07 | 4.02E+06 | 2.39E+06 |
| Total Phyto   | Cells/L | 3.68E+07 | 8.90E+07 | 5.17E+07 | 5.09E+07 | 2.23E+07 | 7.61E+07 | 4.36E+07 | 4.26E+07 |
| TEMP          | °C      | 25.01    | 26.15    | 25.22    | 25.13    | 21.26    | 28.34    | 23.32    | 23.49    |
| DO            | mg/L    | 7.87     | 11.57    | 10.06    | 10.06    | 0.17     | 23.42    | 8.20     | 6.41     |
| SPC           | µS/cm   | 158.90   | 161.10   | 159.53   | 159.40   | 153.30   | 162.30   | 157.48   | 157.95   |
| pH            |         | 8.14     | 8.94     | 8.66     | 8.68     | 6.09     | 9.27     | 7.24     | 6.87     |
| NTU           |         | 7.38     | 25.56    | 9.07     | 8.47     | 7.08     | 18.32    | 10.28    | 9.61     |
| FDOM          | µg/L    | 5.89     | 8.45     | 7.86     | 8.05     | 16.19    | 27.99    | 23.34    | 23.92    |
| CDOM          | µg/L    | 62.71    | 74.25    | 66.60    | 66.39    | 101.51   | 395.28   | 162.09   | 144.44   |
| Chlorophyll-a | RFU     | 477.60   | 784.80   | 652.13   | 662.40   | 793.00   | 5614.00  | 1927.10  | 1637.00  |
| Phycocyanin   | µg/L    | 46.07    | 202.26   | 64.26    | 56.42    | 46.60    | 291.13   | 92.95    | 73.63    |
| TC            | mg/L    | 9.70     | 14.14    | 12.30    | 12.54    | 12.10    | 17.44    | 14.47    | 14.39    |
| TOC           | mg/L    | 4.93     | 6.28     | 5.50     | 5.52     | 6.43     | 10.76    | 8.02     | 8.02     |
| TIC           | mg/L    | 4.65     | 8.02     | 6.63     | 6.86     | 4.41     | 8.52     | 6.44     | 6.42     |
| TNB           | mg/L    | 1.21     | 3.55     | 2.56     | 2.58     | 0.96     | 3.19     | 2.08     | 2.22     |
| 2020          |         |          |          |          |          |          |          |          |          |
| Diatoms       | Cells/L | 2.71E+06 | 1.29E+07 | 6.05E+06 | 5.51E+06 | 1.32E+05 | 2.54E+07 | 3.72E+06 | 2.90E+06 |
| Flagellates   | Cells/L | 2.70E+06 | 1.25E+07 | 6.05E+06 | 5.78E+06 | 4.59E+06 | 3.26E+07 | 1.66E+07 | 1.63E+07 |
| Chlorophytes  | Cells/L | 3.13E+06 | 1.45E+07 | 7.01E+06 | 6.71E+06 | 5.37E+06 | 5.65E+09 | 8.49E+08 | 3.87E+07 |
| Cyanobacteria | Cells/L | ND*      | 1.00E+07 | 1.10E+06 | ND*      | ND*      | 6.47E+07 | 3.87E+06 | ND*      |
| Total Phyto   | Cells/L | 8.54E+06 | 4.18E+07 | 2.02E+07 | 1.98E+07 | 1.56E+07 | 5.68E+09 | 8.73E+08 | 6.56E+07 |
| TEMP          | °C      | 28.69    | 32.35    | 29.49    | 29.08    | 25.28    | 34.65    | 28.49    | 28.19    |
| DO            | mg/L    | 3.17     | 11.08    | 7.75     | 7.66     | 2.06     | 19.80    | 11.97    | 12.17    |
| SPC           | µS/cm   | 175.50   | 179.20   | 178.28   | 178.30   | 49.00    | 146.10   | 94.66    | 82.15    |
| pH            |         | 7.18     | 8.81     | 7.84     | 7.72     | 3.74     | 9.27     | 6.53     | 6.54     |
| NTU           |         | 1.51     | 35.02    | 4.49     | 3.17     | 1.81     | 33.88    | 5.37     | 4.45     |
| FDOM          | µg/L    | 10.55    | 18.26    | 15.89    | 16.41    | 10.03    | 54.12    | 39.62    | 40.05    |
| CDOM          | µg/L    | 55.13    | 68.18    | 62.49    | 62.66    | 94.32    | 279.66   | 143.44   | 139.72   |
| Chlorophyll-a | RFU     | 239.40   | 450.40   | 340.82   | 336.00   | 197.40   | 3613.00  | 829.02   | 651.20   |
| Phycocyanin   | µg/L    | 32.71    | 46.11    | 38.71    | 38.54    | 28.89    | 164.55   | 63.40    | 53.06    |
| TC            | mg/L    | 11.06    | 15.96    | 12.60    | 12.40    | 8.29     | 25.41    | 13.43    | 13.09    |
| TOC           | mg/L    | 4.36     | 6.36     | 4.93     | 4.79     | 4.93     | 15.75    | 8.15     | 7.96     |
| TIC           | mg/L    | 6.47     | 10.05    | 7.67     | 7.70     | 3.04     | 10.16    | 5.28     | 4.77     |
| TNB           | mg/L    | 2.96     | 3.87     | 3.47     | 3.49     | 0.43     | 3.78     | 2.68     | 2.83     |

\*ND – Not detected

Figure S1: Normalized temperature measurements as functions to time of day and depth at Pond 1 and Pond 2 for each sampling date.

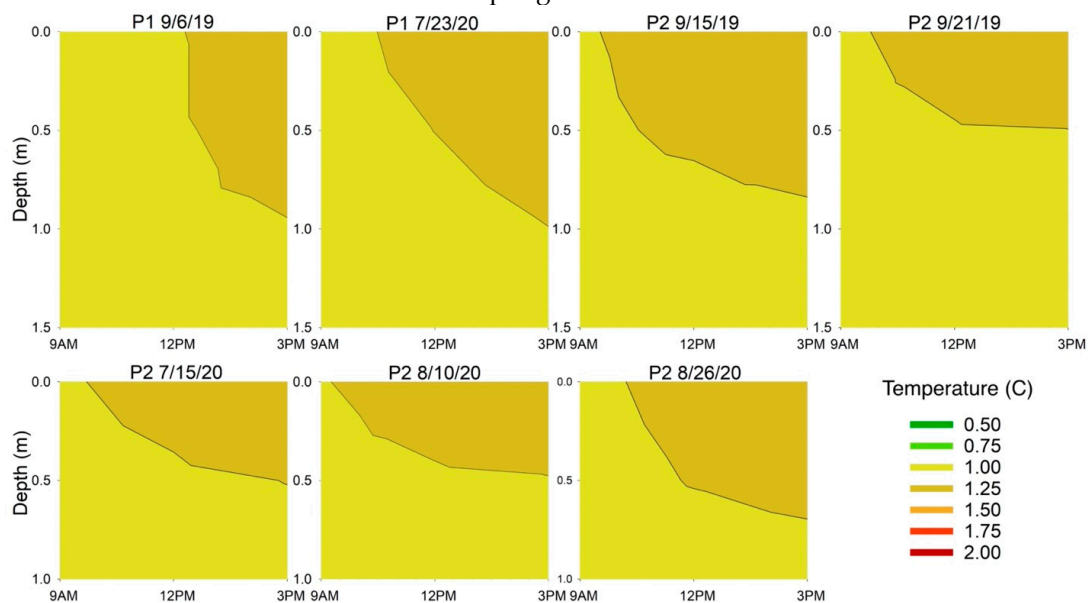

Table S2: Precipitation from one and two weeks prior to sample collection at ponds P1 and P2.

| Dates   | Total accumulation one week prior (mm) | Total accumulation two weeks prior (mm) |
|---------|----------------------------------------|-----------------------------------------|
| P1      |                                        |                                         |
| 9/6/19  | 0.00                                   | 16.51                                   |
| 7/23/20 | 11.68                                  | 37.59                                   |
| P2      |                                        |                                         |
| 9/15/19 | 0.00                                   | 27.94                                   |
| 9/21/19 | 0.51                                   | 0.76                                    |
| 7/15/20 | 0.51                                   | 51.05                                   |
| 8/10/20 | 200.91                                 | 213.87                                  |
| 8/26/20 | 14.22                                  | 199.14                                  |

Table S3: Average solar irradiance (W/m<sup>2</sup>) during sampling at ponds P1 and P2.

| Date    | 9 am   | 12 pm  | 3 pm   |
|---------|--------|--------|--------|
| P1      |        |        |        |
| 9/6/19  | 240.25 | 242.20 | 714.17 |
| 7/23/20 | 206.67 | 889.17 | 923.17 |
| P2      |        |        |        |
| 9/15/19 | 189.60 | 733.36 | 643.62 |
| 9/21/19 | 304.98 | 687.92 | 610.90 |
| 7/15/20 | 720.29 | 915.27 | 740.43 |
| 8/10/20 | 602.54 | 786.71 | 665.78 |
| 8/26/20 | 379.61 | 726.11 | 631.65 |

Table S4: Identified phytoplankton taxa for P1 and P2.

| Table S4: Identified Taxa      |                                 |
|--------------------------------|---------------------------------|
| Pond 1                         | Pond 2                          |
| <i>Aulocoseira</i> spp.        | <i>Aphanizomenon flos-aquae</i> |
| <i>Ceratium</i> spp.           | <i>Aulocoseira</i> spp.         |
| <i>Closterium</i> spp.         | <i>Ceratium</i> spp.            |
| <i>Coelastrum</i> spp.         | <i>Closterium</i> spp.          |
| <i>Cosmarium</i> spp.          | <i>Cosmarium</i> spp.           |
| <i>Cruciginella</i> spp.       | <i>Cryptomonas</i> spp.         |
| <i>Cryptomonas</i> spp.        | <i>Cyclotella</i> spp.          |
| <i>Euglena</i> spp.            | <i>Dolichospermum circinale</i> |
| <i>Fragilaria</i> spp.         | <i>Dolichospermum smithii</i>   |
| <i>Microcystis wesenbergii</i> | <i>Euglena</i> spp.             |
| <i>Monoraphidium</i> spp.      | <i>Gonyostomum semen</i>        |
| <i>Pandorina morum</i>         | <i>Kirchneriella</i> spp.       |
| <i>Pediatrum</i> spp.          | <i>Merismopedia</i> spp.        |
| <i>Scenedesmus</i> spp.        | <i>Microcystis aeruginosa</i>   |
| <i>Staurastrum</i> spp.        | <i>Microcystis panniformis</i>  |
| <i>Stephanodiscus</i> spp.     | <i>Microcystis wesenbergii</i>  |
| <i>Trachelomonas</i> spp.      | <i>Monoraphidium</i> spp.       |
| <i>Westella</i> spp.           | <i>Pandorina morum</i>          |
|                                | <i>Tetradriella</i> spp.        |
|                                | <i>Tetraedron</i> spp.          |
|                                | <i>Scenedesmus</i> spp.         |
|                                | <i>Stephanodiscus</i> spp.      |
|                                | <i>Synura</i> spp.              |
|                                | <i>Trachelomonas</i> spp.       |

Tables S5 – S11. Correlations between measured water quality parameters, photosynthetic pigments, and phytoplankton cell abundance for each sampling date. Mild correlations are depicted green (correlation coefficient 0.300-0.499), moderate correlations are depicted in yellow (0.500-0.699), and strong correlations are depicted in red (0.700-0.999). Abbreviations in Tables S4-S10: °C – Temperature, Celsius, DO dissolved oxygen, mg L<sup>-1</sup>, SPC – specific conductance, µS cm<sup>-1</sup>, NTU – turbidity, NTU, fDOM – fluorescent dissolved organic matter, relative fluorescent units [RFU], CDOM - colored dissolved organic matter, µg L<sup>-1</sup>, TC – total carbon, mg L<sup>-1</sup>, TOC – total organic carbon, mg L<sup>-1</sup>, TIC, total inorganic carbon, mg L<sup>-1</sup>. TnB – total bound nitrogen, mg L<sup>-1</sup>, DIA – diatom cell count, CHLOR – chlorophyte cell count, FLAG – flagellate cell count, CYA – cyanobacteria, cell count, TOT – total number of phytoplankton cells counted.

| Legend for Tables S5-S11 |                         |
|--------------------------|-------------------------|
| Color                    | Correlation Coefficient |
|                          | < 0.300                 |
| mild                     | 0.300 – 0.499           |
| moderate                 | 0.500 – 0.699           |
| strong                   | 0.700 – 0.999           |

**Table S5: Pond 1 – 9/6/19**

[illegible]

Table S6: Pond 1 – 7/23/20

[illegible]

**Table S7: Pond 2 – 9/15/19**

|       | °C     | DO     | SPC   | pH     | NTU   | FDOM  | Phyco  | CHL    | CDOM  | TC     | TOC   | TIC   | TnB    | DIA   | CYA   | FLAG  | CHLOR | TOT   |
|-------|--------|--------|-------|--------|-------|-------|--------|--------|-------|--------|-------|-------|--------|-------|-------|-------|-------|-------|
| °C    | Black  | Gray   | Gray  | Gray   | Gray  | Gray  | Gray   | Gray   | Gray  | Gray   | Gray  | Gray  | Gray   | Gray  | Gray  | Gray  | Gray  | Gray  |
| DO    | Red    | Black  | Gray  | Gray   | Gray  | Gray  | Gray   | Gray   | Gray  | Gray   | Gray  | Gray  | Gray   | Gray  | Gray  | Gray  | Gray  | Gray  |
| SPC   | Gray   | Gray   | Black | Gray   | Gray  | Gray  | Gray   | Gray   | Gray  | Gray   | Gray  | Gray  | Gray   | Gray  | Gray  | Gray  | Gray  | Gray  |
| pH    | Red    | Red    | Gray  | Black  | Gray  | Gray  | Gray   | Gray   | Gray  | Gray   | Gray  | Gray  | Gray   | Gray  | Gray  | Gray  | Gray  | Gray  |
| NTU   | Gray   | Gray   | Gray  | Gray   | Black | Gray  | Gray   | Gray   | Gray  | Gray   | Gray  | Gray  | Gray   | Gray  | Gray  | Gray  | Gray  | Gray  |
| FDOM  | Gray   | Gray   | Red   | Gray   | Gray  | Black | Gray   | Gray   | Gray  | Gray   | Gray  | Gray  | Gray   | Gray  | Gray  | Gray  | Gray  | Gray  |
| Phyco | Red    | Red    | Gray  | Red    | Green | Gray  | Black  | Gray   | Gray  | Gray   | Gray  | Gray  | Gray   | Gray  | Gray  | Gray  | Gray  | Gray  |
| CHL   | Yellow | Yellow | Gray  | Yellow | Gray  | Gray  | Red    | Black  | Gray  | Gray   | Gray  | Gray  | Gray   | Gray  | Gray  | Gray  | Gray  | Gray  |
| CDOM  | Red    | Yellow | Gray  | Red    | Green | Gray  | Red    | Red    | Black | Gray   | Gray  | Gray  | Gray   | Gray  | Gray  | Gray  | Gray  | Gray  |
| TC    | Gray   | Gray   | Gray  | Gray   | Gray  | Gray  | Gray   | Green  | Green | Black  | Gray  | Gray  | Gray   | Gray  | Gray  | Gray  | Gray  | Gray  |
| TOC   | Yellow | Yellow | Gray  | Yellow | Gray  | Gray  | Yellow | Yellow | Red   | Yellow | Black | Gray  | Gray   | Gray  | Gray  | Gray  | Gray  | Gray  |
| TIC   | Gray   | Gray   | Gray  | Gray   | Gray  | Gray  | Gray   | Gray   | Gray  | Red    | Gray  | Black | Gray   | Gray  | Gray  | Gray  | Gray  | Gray  |
| TnB   | Gray   | Gray   | Gray  | Gray   | Green | Gray  | Gray   | Gray   | Gray  | Gray   | Gray  | Gray  | Black  | Gray  | Gray  | Gray  | Gray  | Gray  |
| DIA   | Gray   | Gray   | Gray  | Gray   | Gray  | Gray  | Gray   | Gray   | Gray  | Gray   | Gray  | Gray  | Green  | Black | Gray  | Gray  | Gray  | Gray  |
| CYA   | Gray   | Gray   | Gray  | Gray   | Gray  | Gray  | Gray   | Gray   | Gray  | Gray   | Gray  | Gray  | Gray   | Gray  | Black | Gray  | Gray  | Gray  |
| FLAG  | Green  | Gray   | Gray  | Green  | Green | Gray  | Yellow | Green  | Green | Gray   | Green | Gray  | Green  | Gray  | Gray  | Black | Gray  | Gray  |
| CHLOR | Green  | Gray   | Gray  | Green  | Green | Gray  | Yellow | Green  | Green | Gray   | Green | Gray  | Green  | Gray  | Gray  | White | Black | Gray  |
| TOT   | Gray   | Gray   | Gray  | Green  | Green | Gray  | Green  | Green  | Green | Gray   | Green | Gray  | Yellow | Gray  | Gray  | Red   | Red   | Black |

Table S8: Pond 2 – 9/21/19

|       | °C    | DO    | SPC    | pH    | NTU    | FDOM  | Phyco | CHL   | CDOM  | TC    | TOC   | TIC   | TnB   | DIA   | CYA   | FLAG   | CHLOR  | TOT   |
|-------|-------|-------|--------|-------|--------|-------|-------|-------|-------|-------|-------|-------|-------|-------|-------|--------|--------|-------|
| °C    | Black | Grey  | Grey   | Grey  | Grey   | Grey  | Grey  | Grey  | Grey  | Grey  | Grey  | Grey  | Grey  | Grey  | Grey  | Grey   | Grey   | Grey  |
| DO    | Red   | Black | Grey   | Grey  | Grey   | Grey  | Grey  | Grey  | Grey  | Grey  | Grey  | Grey  | Grey  | Grey  | Grey  | Grey   | Grey   | Grey  |
| SPC   | White | White | Black  | Grey  | Grey   | Grey  | Grey  | Grey  | Grey  | Grey  | Grey  | Grey  | Grey  | Grey  | Grey  | Grey   | Grey   | Grey  |
| pH    | Red   | Red   | White  | Black | Grey   | Grey  | Grey  | Grey  | Grey  | Grey  | Grey  | Grey  | Grey  | Grey  | Grey  | Grey   | Grey   | Grey  |
| NTU   | Green | Green | White  | Green | Black  | Grey   | Grey   | Grey  |
| FDOM  | White | White | Yellow | White | White  | Black | Grey   | Grey   | Grey  |
| Phyco | Green | Green | White  | White | Yellow | White | Black | Grey   | Grey   | Grey  |
| CHL   | White | White | White  | White | Green  | White | Red   | Black | Grey   | Grey   | Grey  |
| CDOM  | Green | Green | White  | White | Red    | White | Red   | Red   | Black | Grey   | Grey   | Grey  |
| TC    | White | White | White  | White | Green  | White | Green | White | Green | Black | Grey  | Grey  | Grey  | Grey  | Grey  | Grey   | Grey   | Grey  |
| TOC   | White | White | White  | White | Green  | White | White | White | White | Red   | Black | Grey  | Grey  | Grey  | Grey  | Grey   | Grey   | Grey  |
| TIC   | White | White | White  | White | White  | White | White | White | White | Red   | Green | Black | Grey  | Grey  | Grey  | Grey   | Grey   | Grey  |
| TnB   | White | Green | White  | White | White  | White | White | White | White | White | White | White | Black | Grey  | Grey  | Grey   | Grey   | Grey  |
| DIA   | White | White | White  | White | White  | White | White | White | White | White | White | White | White | Black | Grey  | Grey   | Grey   | Grey  |
| CYA   | White | White | White  | White | White  | White | White | Green | White | White | White | White | White | White | Black | Grey   | Grey   | Grey  |
| FLAG  | White | White | White  | White | White  | White | White | Green | White | Black  | Grey   | Grey  |
| CHLOR | White | White | White  | White | White  | White | White | Green | White  | Black  | Grey  |
| TOT   | White | White | Green  | White | White  | White | White | White | White | White | White | White | White | Green | Green | Yellow | Yellow | Black |

**Table S9: Pond 2 – 7/15/20**

[illegible]

**Table S10: Pond 2 – 8/10/20**

[illegible]

**Table S11: Pond 2 – 8/26/20**

[illegible]
